# Supplementary material for: CoFe2O4 supported g-C3N4 nanocomposite for the sensitive electrochemical detection of dopamine
Source: Royal Society of Chemistry journal article supplement (doi:10.1039/d1nj02188e), 2021-01-01
Supplement: d1nj02188e1.pdf [file d1nj02188e1.pdf]

**Supporting information**

**CoFe<sub>2</sub>O<sub>4</sub> supported g-C<sub>3</sub>N<sub>4</sub> nanocomposite for sensitive electrochemical detection of dopamine**

Xavier Benadict Joseph<sup>†</sup>, NM Umesh<sup>†</sup>, Sea-Fue Wang,\* J Antolin Jesila

Department of Materials and Mineral Resources Engineering, National Taipei University of Technology, No. 1, Sec. 3, Chung-Hsiao East Rd., Taipei 106, Taiwan.

<sup>†</sup>Authors are contributed equally to this work.

**Corresponding author:**

S.F. Wang, Email: [sfwang@ntut.edu.tw](mailto:sfwang@ntut.edu.tw)

### Instrumental Characterizations.

The surface morphology and the elemental composition of the synthesized samples were studied utilizing electron microscope (JSM-6510 LV series), energy dispersive X-ray spectroscopy (JOEL serive advanced Technology). Phase configuration was identified using Bruker (XRD, Rigaku D/maxB, DMX-2200). X-ray photoelectron spectroscopy ESCA/Auger Laboratory (National Taiwan University, Taiwan) was applied to quantitatively analyse the chemical composition of the materials while the electrochemical properties were explored using electrochemical impedance spectroscopy (EIS) through Autolab.

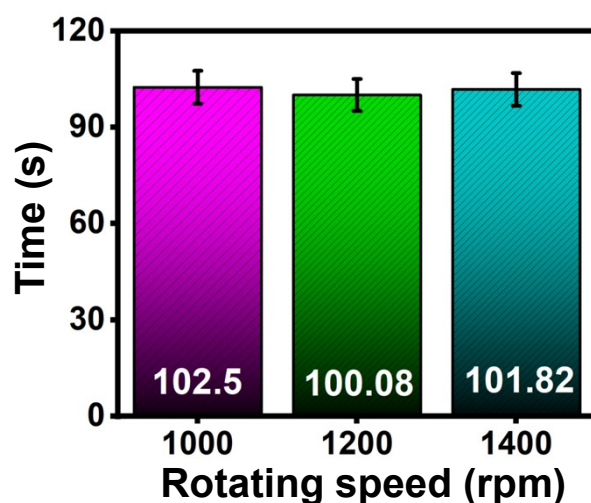

Fig. S1. Bare diagram for rotation speed versus response time.

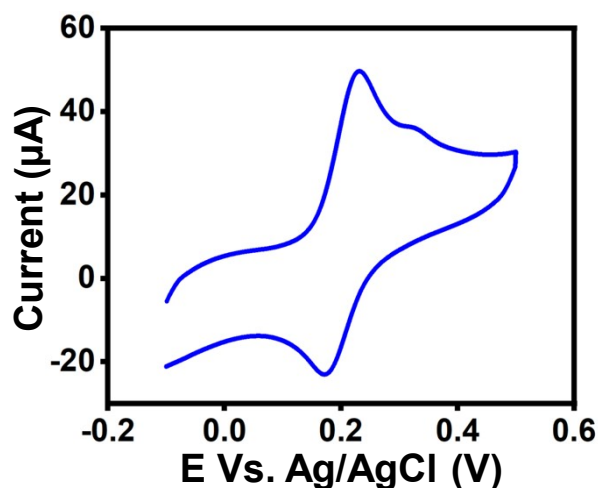

Fig. S2. The CVs of DA with the co-presence of AA and UA.

**S-Table 1.** Real sample analysis

| <b>Samples</b> | <b>Added (nM)</b> | <b>Found (nM)</b> | <b>Recovery (%)</b> | <b>RSD (%)</b> |
|----------------|-------------------|-------------------|---------------------|----------------|
| Urine          | 5                 | 4.955             | 99.10               | 1.47           |
|                | 10                | 9.921             | 99.21               | 1.59           |
| Blood serum    | 0.15              | 0.148             | 98.66               | 2.14           |
|                | 0.3               | 0.295             | 98.33               | 1.84           |
